# Supplementary material for: Analysis of Physiological and Transcriptomic Differences between a Premature Senescence Mutant (GSm) and Its Wild-Type in Common Wheat (Triticum aestivum L.)
Source: MDPI journal article supplement (doi:10.3390/biology11060904), 2022-06-12
Supplement: s1 [file s1]

## Supplementary Materials:

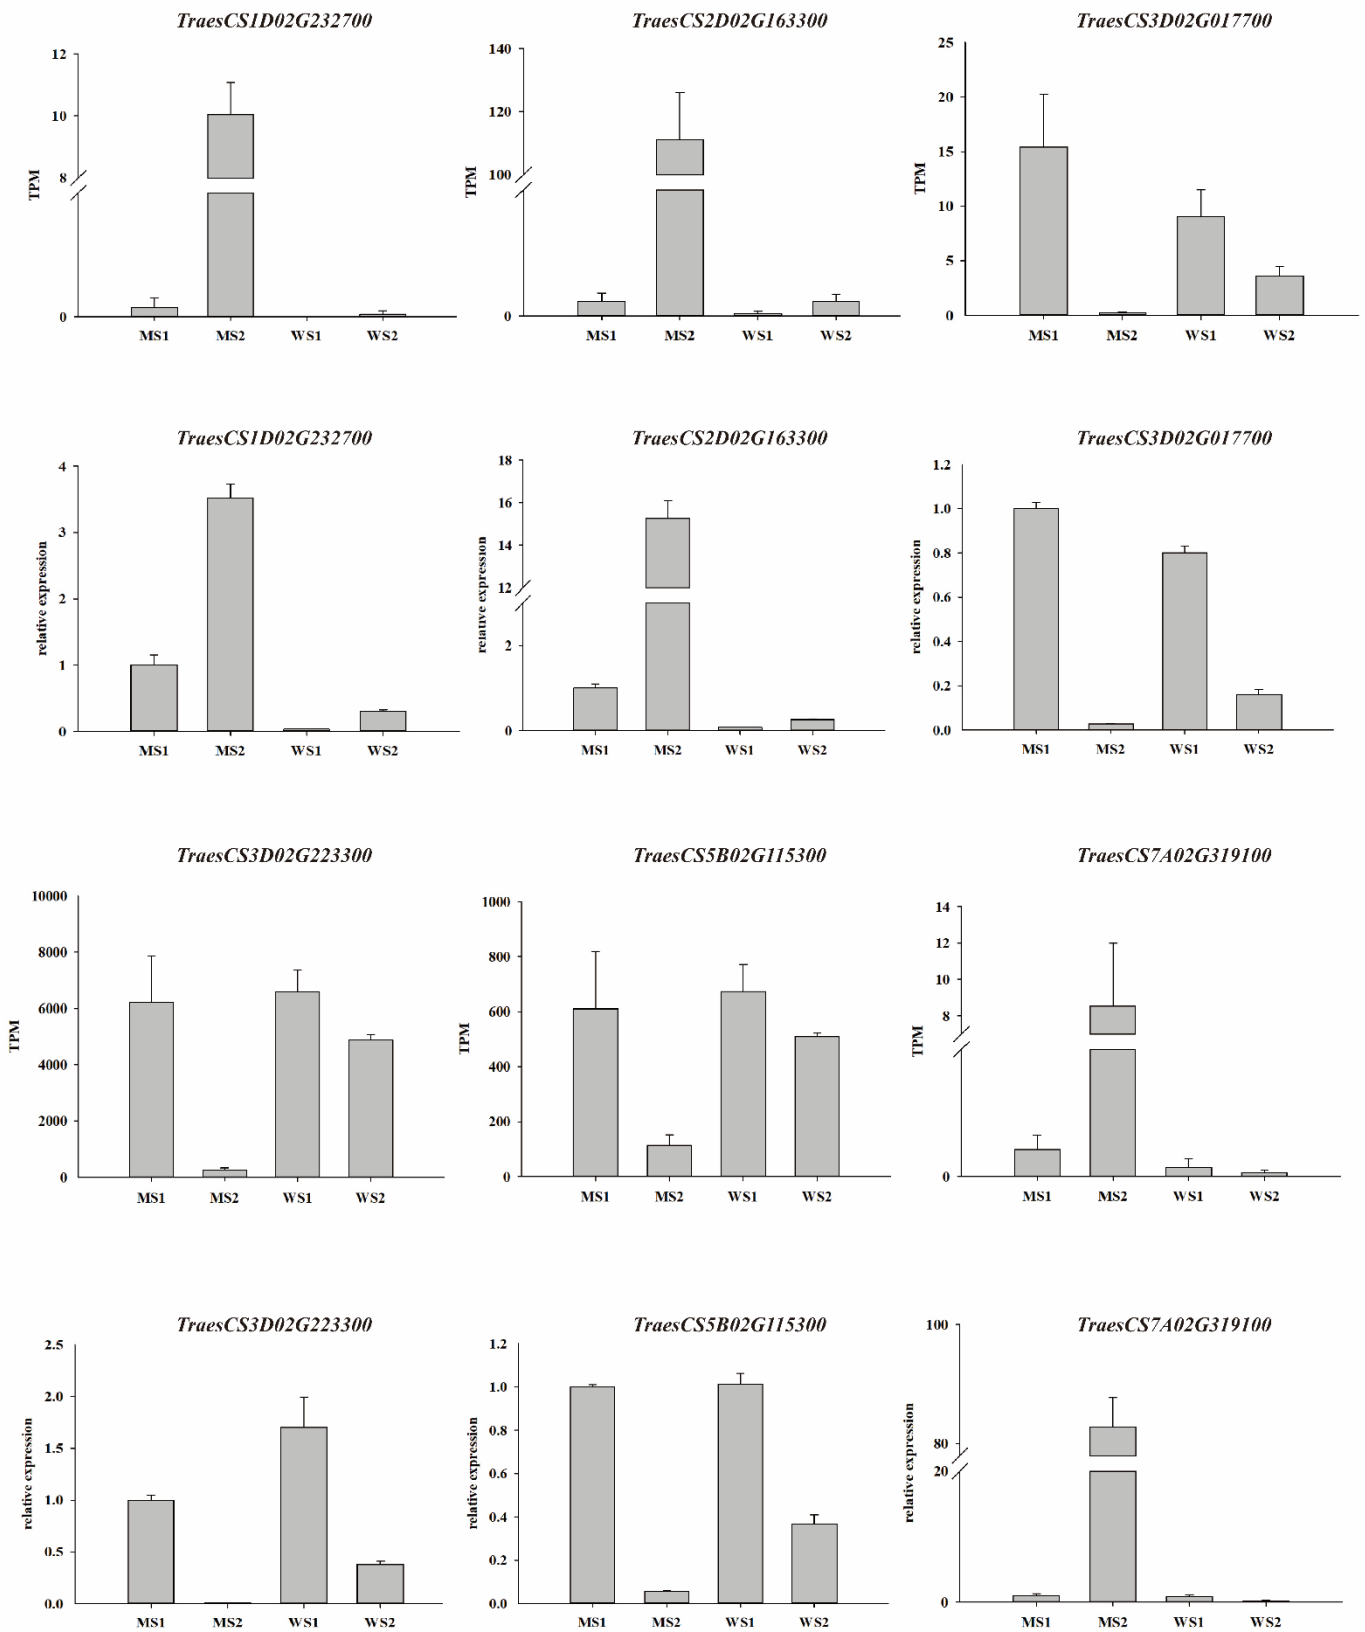

**Figure S1.** Some important differentially expressed genes verified using qRT-PCR. The error bars represent the SD of the means (n=3).

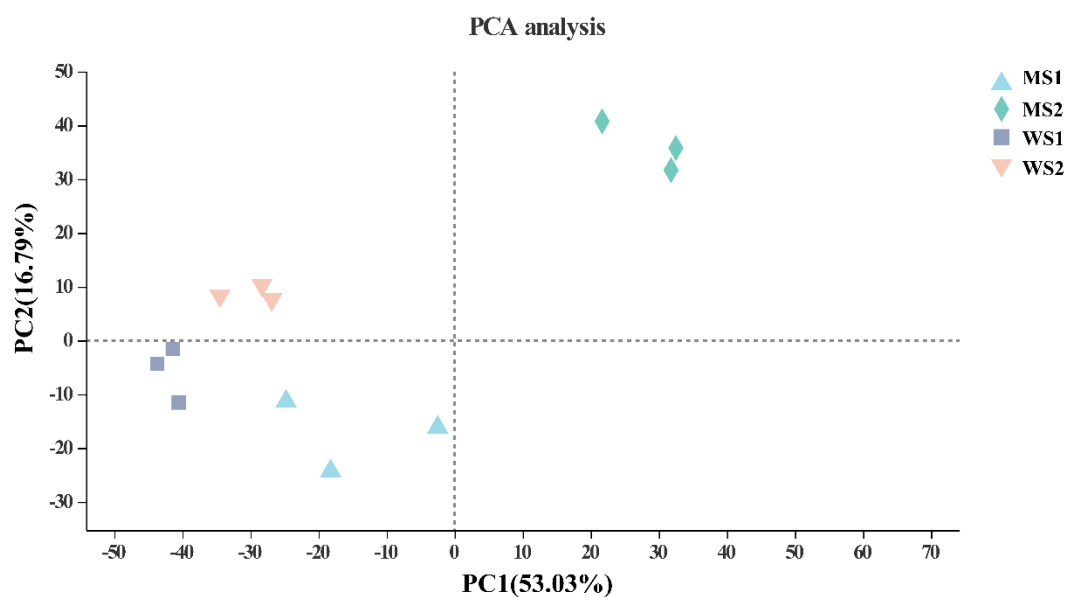

Figure S2. PCA of the different samples

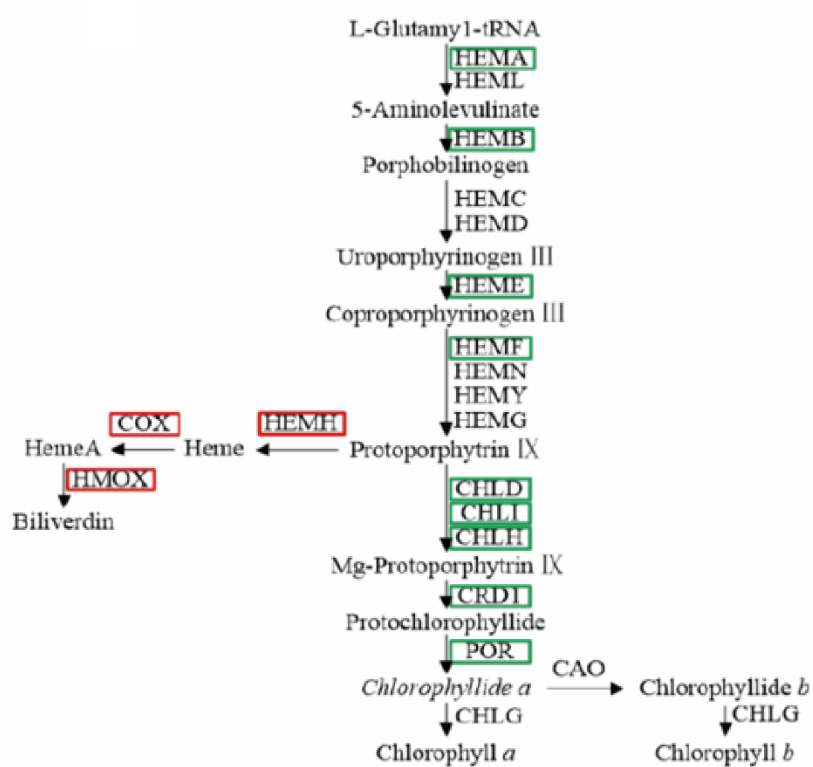

Figure S3. chlorophyll metabolic pathway of common wheat (Green indicates down-regulated expression and red indicates up-regulated expression). RNA-seq was done in the flag leaf of Common wheat variety Jinmai 39 and leave samples were collected at 0 d, 26 d and 30 d after flowering (unpublished data)

**Table S1** Quality and Mapping reads of RNA-Seq

| Sample | Raw Reads_count | Clean Reads_count | Q30 (%) | GC (%) | Total reads | Total mapped      | Uniquely mapped  | Multiple mapped |
|--------|-----------------|-------------------|---------|--------|-------------|-------------------|------------------|-----------------|
| M1     | 91547686        | 90012704          | 94.67   | 53.42  | 90012704    | 84523691(93.9%)   | 78373864(87.07%) | 6149827(6.83%)  |
| M2     | 89131316        | 87706630          | 94.57   | 53.07  | 87706630    | 77898047(88.82%)  | 68579815(78.19%) | 9318232(10.62%) |
| M3     | 81887406        | 80316034          | 94.84   | 53.63  | 80316034    | 76142421(94.8%)   | 70661264(87.98%) | 5481157(6.82%)  |
| M4     | 111664866       | 110585930         | 94.53   | 54.24  | 110585930   | 103756753(93.82%) | 97320367(88.0%)  | 6436386(5.82%)  |
| M5     | 90985480        | 88694184          | 94.85   | 50.79  | 88694184    | 81847536(92.28%)  | 76924741(86.73%) | 4922795(5.55%)  |
| M6     | 84213886        | 83136932          | 95      | 51.84  | 83136932    | 77722570(93.49%)  | 73162384(88.0%)  | 4560186(5.49%)  |
| W1     | 85454918        | 83822848          | 94.74   | 53.75  | 83822848    | 79645106(95.02%)  | 73911660(88.18%) | 5733446(6.84%)  |
| W2     | 86248568        | 84807488          | 95.11   | 53.29  | 84807488    | 79414453(93.64%)  | 73418187(86.57%) | 5996266(7.07%)  |
| W3     | 90636228        | 89005610          | 94.67   | 53.54  | 89005610    | 82107718(92.25%)  | 74980439(84.24%) | 7127279(8.01%)  |
| W4     | 85008150        | 84155078          | 94.97   | 54.58  | 84155078    | 79602497(94.59%)  | 73609274(87.47%) | 5993223(7.12%)  |
| W5     | 92551164        | 91625676          | 95.1    | 54.38  | 91625676    | 86616629(94.53%)  | 79597507(86.87%) | 7019122(7.66%)  |
| W6     | 84262204        | 83292476          | 94.57   | 54.88  | 83292476    | 78440381(94.17%)  | 72709815(87.29%) | 5730566(6.88%)  |

**Table S2** List of Chlorophyll-related DEGs identified in WT and *GSm*

| Gene_id                   | MS1    | MS2   | WS1    | WS2    | Ko name |
|---------------------------|--------|-------|--------|--------|---------|
| <i>TraesCS1A02G057200</i> | 40.71  | 4.04  | 45.97  | 51.37  | hema    |
| <i>TraesCS1A02G173100</i> | 48.46  | 19.61 | 56.63  | 34.23  | hema    |
| <i>TraesCS1B02G075200</i> | 33.76  | 3.97  | 41.11  | 52.03  | hema    |
| <i>TraesCS1B02G191200</i> | 111.40 | 44.28 | 120.50 | 127.11 | hema    |
| <i>TraesCS1D02G058300</i> | 31.38  | 3.85  | 33.71  | 39.24  | hema    |
| <i>TraesCS1D02G165600</i> | 76.10  | 27.37 | 82.64  | 65.11  | hema    |
| <i>TraesCS6B02G136500</i> | 0.33   | 0.35  | 0.31   | 1.08   | hemb    |
| <i>TraesCS4B02G302400</i> | 7.37   | 5.84  | 9.87   | 10.78  | hemd    |
| <i>TraesCS4B02G168300</i> | 38.55  | 29.50 | 37.00  | 27.55  | heme    |
| <i>TraesCS2A02G426900</i> | 27.95  | 26.98 | 33.64  | 59.12  | hemf    |
| <i>TraesCS2B02G447300</i> | 18.21  | 19.32 | 25.19  | 55.18  | hemf    |
| <i>TraesCS2D02G425000</i> | 32.57  | 21.08 | 38.13  | 77.17  | hemf    |
| <i>TraesCS6A02G213400</i> | 4.76   | 2.00  | 5.98   | 3.41   | hemf    |
| <i>TraesCS6B02G243500</i> | 10.35  | 2.36  | 9.64   | 15.16  | hemf    |
| <i>TraesCS6D02G196100</i> | 6.65   | 1.50  | 7.71   | 9.63   | hemf    |
| <i>TraesCS7B02G234200</i> | 1.68   | 0.16  | 1.94   | 2.31   | hemf    |
| <i>TraesCS2A02G347900</i> | 1.02   | 4.29  | 1.25   | 2.73   | hemy    |
| <i>TraesCS2D02G346200</i> | 2.01   | 5.63  | 1.98   | 2.34   | hemy    |
| <i>TraesCS5A02G045700</i> | 9.43   | 14.99 | 14.07  | 27.88  | hemy    |
| <i>TraesCS5B02G049800</i> | 5.69   | 9.80  | 9.28   | 18.14  | hemy    |
| <i>TraesCS5D02G055700</i> | 10.66  | 13.30 | 17.01  | 25.37  | hemy    |
| <i>TraesCS2A02G134000</i> | 35.67  | 6.21  | 40.43  | 73.49  | chlh    |
| <i>TraesCS2B02G157600</i> | 36.56  | 12.67 | 43.00  | 76.70  | chlh    |
| <i>TraesCS2D02G136200</i> | 27.14  | 8.65  | 35.64  | 55.62  | chlh    |
| <i>TraesCS5A02G466100</i> | 27.12  | 19.05 | 32.93  | 39.05  | chld    |
| <i>TraesCS5B02G477800</i> | 5.92   | 4.16  | 7.47   | 10.49  | chld    |
| <i>TraesCS5D02G478900</i> | 14.77  | 9.81  | 17.37  | 27.07  | chld    |
| <i>TraesCS7A02G480700</i> | 68.32  | 51.07 | 67.04  | 116.59 | chll    |
| <i>TraesCS7B02G382800</i> | 68.35  | 47.55 | 67.39  | 101.85 | chll    |
| <i>TraesCS7D02G467500</i> | 79.41  | 60.19 | 73.39  | 133.27 | chll    |
| <i>TraesCS4A02G420600</i> | 24.42  | 18.22 | 46.15  | 46.22  | chlm    |

|                           |        |       |        |        |           |
|---------------------------|--------|-------|--------|--------|-----------|
| <i>TraesCS7A02G068500</i> | 39.30  | 26.21 | 62.58  | 56.90  | chlm      |
| <i>TraesCS7D02G062900</i> | 28.20  | 21.34 | 50.20  | 61.69  | chlm      |
| <i>TraesCS3A02G191700</i> | 337.91 | 87.87 | 357.79 | 574.65 | acsf      |
| <i>TraesCS3B02G219700</i> | 217.15 | 58.59 | 220.98 | 404.89 | acsf      |
| <i>TraesCS3D02G194300</i> | 222.23 | 49.75 | 242.81 | 456.82 | acsf      |
| <i>TraesCS4A02G140700</i> | 12.36  | 5.97  | 19.03  | 14.12  | dvr       |
| <i>TraesCS6A02G403800</i> | 20.23  | 13.06 | 26.37  | 36.69  | dvr       |
| <i>TraesCS6B02G447700</i> | 36.88  | 19.33 | 44.41  | 42.20  | dvr       |
| <i>TraesCS6D02G387300</i> | 15.51  | 8.47  | 23.39  | 23.43  | dvr       |
| <i>TraesCS1A02G171000</i> | 85.11  | 45.41 | 126.29 | 163.23 | por       |
| <i>TraesCS1B02G186300</i> | 183.58 | 68.23 | 255.10 | 300.11 | por       |
| <i>TraesCS1D02G168700</i> | 84.84  | 43.47 | 138.42 | 181.23 | por       |
| <i>TraesCS2A02G590600</i> | 0.59   | 0.01  | 1.14   | 1.95   | por       |
| <i>TraesCS2B02G593000</i> | 0.43   | 0.00  | 0.40   | 0.22   | por       |
| <i>TraesCS2D02G563600</i> | 4.82   | 0.00  | 2.95   | 16.41  | por       |
| <i>TraesCS3A02G506200</i> | 27.62  | 6.85  | 34.56  | 78.10  | cao       |
| <i>TraesCS3B02G574300</i> | 23.59  | 4.78  | 29.78  | 68.41  | cao       |
| <i>TraesCS3D02G514100</i> | 22.82  | 6.56  | 31.27  | 89.61  | cao       |
| <i>TraesCS1A02G224700</i> | 29.46  | 41.43 | 45.20  | 65.68  | chlg      |
| <i>TraesCS1B02G237700</i> | 42.88  | 58.52 | 59.70  | 75.55  | chlg      |
| <i>TraesCS1D02G226100</i> | 23.11  | 37.38 | 35.39  | 54.62  | chlg      |
| <i>TraesCS4A02G411000</i> | 14.14  | 48.78 | 11.93  | 14.18  | pao /acd1 |
| <i>TraesCS4B02G311100</i> | 33.09  | 67.99 | 24.75  | 27.21  | pao /acd2 |
| <i>TraesCS4D02G309000</i> | 29.99  | 71.34 | 28.46  | 26.79  | pao /acd3 |
| <i>TraesCS3A02G151900</i> | 25.35  | 27.56 | 38.21  | 39.04  | NOL, NYC1 |
| <i>TraesCS3B02G179100</i> | 28.93  | 32.65 | 44.29  | 38.29  | NOL, NYC2 |
| <i>TraesCS3D02G159800</i> | 53.94  | 74.43 | 67.15  | 66.35  | NOL, NYC3 |
| <i>TraesCS4A02G299400</i> | 5.63   | 23.45 | 7.22   | 11.53  | NOL, NYC4 |
| <i>TraesCS4D02G012100</i> | 6.08   | 35.91 | 8.09   | 12.21  | NOL, NYC5 |
| <i>TraesCS6B02G357800</i> | 6.07   | 34.33 | 6.95   | 10.09  | NOL, NYC6 |

---

**Table S3** List of carotenoid synthesis related DEGs identified in WT and *GSm*

| Gene_id                   | MS1   | MS2   | WS1   | WS2   | KO_name |
|---------------------------|-------|-------|-------|-------|---------|
| <i>TraesCS5A02G033700</i> | 19.23 | 12.73 | 32.54 | 32.65 | Z-ISO   |
| <i>TraesCS1A02G071700</i> | 11.39 | 8.30  | 12.37 | 13.89 | crtISO  |
| <i>TraesCS1D02G074300</i> | 4.81  | 3.53  | 4.73  | 4.61  | crtISO  |
| <i>TraesCS3A02G208800</i> | 7.43  | 2.93  | 10.53 | 14.57 | crtE    |
| <i>TraesCS3B02G239100</i> | 6.99  | 2.20  | 8.24  | 14.97 | crtE    |
| <i>TraesCS3D02G211700</i> | 10.63 | 4.29  | 16.00 | 18.07 | crtE    |
| <i>TraesCS6A02G171200</i> | 21.43 | 6.50  | 21.42 | 23.84 | CrtL-b  |
| <i>TraesCS6D02G377900</i> | 44.12 | 27.40 | 78.71 | 36.11 | LUT5    |
| <i>TraesCS1D02G210200</i> | 35.59 | 32.96 | 46.54 | 83.12 | LUT1    |
| <i>TraesCS2A02G280500</i> | 36.85 | 14.74 | 47.87 | 22.84 | VDE     |
| <i>TraesCS2B02G297800</i> | 47.46 | 23.58 | 56.30 | 35.82 | VDE     |
| <i>TraesCS2D02G279300</i> | 35.59 | 19.10 | 44.22 | 28.01 | VDE     |

**Table S4** List of photosynthesis related DEGs identified in WT and *GSm*

| Gene_id                   | MS1     | MS2    | WS1     | WS2     | KO_name |
|---------------------------|---------|--------|---------|---------|---------|
| <i>TraesCS7A02G227100</i> | 1293.96 | 102.48 | 1466.26 | 2119.12 | LHCA1   |
| <i>TraesCS7B02G192500</i> | 924.69  | 81.95  | 1121.82 | 1661.67 | LHCA1   |
| <i>TraesCS7D02G227300</i> | 1082.61 | 76.25  | 1318.31 | 1571.81 | LHCA1   |
| <i>TraesCS2A02G187200</i> | 1794.38 | 183.34 | 2213.54 | 2857.69 | LHCA2   |
| <i>TraesCS2B02G220100</i> | 1676.32 | 136.99 | 1952.99 | 2647.84 | LHCA2   |
| <i>TraesCS2D02G200700</i> | 1551.23 | 81.63  | 1862.88 | 1929.55 | LHCA2   |
| <i>TraesCS5A02G213000</i> | 116.21  | 63.55  | 169.86  | 158.73  | LHCA2   |
| <i>TraesCS5B02G210800</i> | 72.06   | 21.76  | 87.57   | 125.32  | LHCA2   |
| <i>TraesCS5D02G219100</i> | 73.87   | 36.70  | 112.82  | 134.78  | LHCA2   |
| <i>TraesCS6A02G159800</i> | 620.83  | 65.88  | 809.40  | 1225.28 | LHCA3   |
| <i>TraesCS6B02G191500</i> | 744.79  | 78.10  | 868.94  | 1267.66 | LHCA3   |
| <i>TraesCS6D02G152700</i> | 868.93  | 75.77  | 1039.59 | 1538.34 | LHCA3   |
| <i>TraesCS5A02G229300</i> | 546.03  | 36.40  | 713.22  | 1544.59 | LHCA4   |
| <i>TraesCS5B02G227900</i> | 708.83  | 51.74  | 914.67  | 1624.98 | LHCA4   |
| <i>TraesCS5D02G238300</i> | 779.54  | 62.42  | 1029.45 | 1904.87 | LHCA4   |

|                           |         |       |         |         |       |
|---------------------------|---------|-------|---------|---------|-------|
| <i>TraesCS6A02G319700</i> | 84.17   | 25.14 | 117.50  | 84.59   | LHCA5 |
| <i>TraesCS6B02G350500</i> | 74.65   | 29.21 | 90.42   | 72.77   | LHCA5 |
| <i>TraesCS6D02G299200</i> | 104.33  | 35.00 | 128.13  | 118.17  | LHCA5 |
| <i>TraesCS1A02G306600</i> | 2.01    | 0.10  | 1.98    | 19.53   | LHCB1 |
| <i>TraesCS1A02G403300</i> | 461.23  | 10.83 | 608.68  | 1876.75 | LHCB1 |
| <i>TraesCS1A02G403800</i> | 4.41    | 0.12  | 6.31    | 12.71   | LHCB1 |
| <i>TraesCS1B02G317500</i> | 4.90    | 0.02  | 5.12    | 30.62   | LHCB1 |
| <i>TraesCS1B02G388200</i> | 30.66   | 0.43  | 26.31   | 77.18   | LHCB1 |
| <i>TraesCS1B02G388300</i> | 1.30    | 0.03  | 0.50    | 5.83    | LHCB1 |
| <i>TraesCS1B02G388400</i> | 7.48    | 0.00  | 5.98    | 24.43   | LHCB1 |
| <i>TraesCS1B02G388500</i> | 1.02    | 0.00  | 0.40    | 2.15    | LHCB1 |
| <i>TraesCS1B02G432700</i> | 738.15  | 24.39 | 1122.95 | 2800.04 | LHCB1 |
| <i>TraesCS1B02G433300</i> | 9.92    | 0.13  | 14.32   | 37.81   | LHCB1 |
| <i>TraesCS1D02G306200</i> | 1.86    | 0.01  | 2.48    | 14.87   | LHCB1 |
| <i>TraesCS1D02G374900</i> | 1.35    | 0.06  | 1.29    | 20.36   | LHCB1 |
| <i>TraesCS1D02G375000</i> | 12.18   | 0.08  | 11.76   | 30.72   | LHCB1 |
| <i>TraesCS1D02G375100</i> | 19.88   | 1.01  | 25.48   | 125.72  | LHCB1 |
| <i>TraesCS1D02G411300</i> | 564.89  | 17.00 | 733.76  | 1621.80 | LHCB1 |
| <i>TraesCS1D02G411600</i> | 4.06    | 0.01  | 7.46    | 19.03   | LHCB1 |
| <i>TraesCS5A02G350600</i> | 921.71  | 33.28 | 799.98  | 1919.83 | LHCB1 |
| <i>TraesCS5A02G454200</i> | 22.41   | 0.04  | 16.12   | 28.83   | LHCB1 |
| <i>TraesCS5A02G454300</i> | 8.39    | 0.14  | 6.19    | 10.40   | LHCB1 |
| <i>TraesCS5B02G353200</i> | 1375.10 | 45.20 | 1711.63 | 2644.61 | LHCB1 |
| <i>TraesCS5B02G462800</i> | 0.37    | 0.00  | 0.31    | 0.74    | LHCB1 |
| <i>TraesCS5B02G463000</i> | 7.89    | 0.00  | 5.85    | 27.17   | LHCB1 |
| <i>TraesCS5B02G463100</i> | 68.33   | 0.03  | 65.24   | 231.55  | LHCB1 |
| <i>TraesCS5D02G357600</i> | 831.62  | 17.20 | 718.30  | 1496.39 | LHCB1 |
| <i>TraesCS5D02G464700</i> | 59.75   | 0.17  | 63.39   | 228.70  | LHCB1 |
| <i>TraesCS5D02G464800</i> | 19.99   | 0.01  | 31.40   | 69.61   | LHCB1 |
| <i>TraesCS5D02G464900</i> | 3.50    | 0.00  | 2.76    | 6.34    | LHCB1 |
| <i>TraesCS6A02G093700</i> | 0.16    | 0.00  | 0.16    | 0.20    | LHCB1 |
| <i>TraesCS6A02G094200</i> | 17.44   | 0.06  | 24.95   | 61.27   | LHCB1 |
| <i>TraesCS6A02G094300</i> | 19.10   | 0.05  | 23.66   | 38.51   | LHCB1 |

|                           |         |       |         |         |       |
|---------------------------|---------|-------|---------|---------|-------|
| <i>TraesCS6A02G094400</i> | 0.21    | 0.00  | 0.39    | 0.15    | LHCB1 |
| <i>TraesCS6A02G094600</i> | 4.13    | 0.00  | 6.45    | 12.11   | LHCB1 |
| <i>TraesCS6B02G122600</i> | 1.29    | 0.03  | 2.59    | 3.73    | LHCB1 |
| <i>TraesCS6D02G088800</i> | 0.82    | 0.00  | 0.68    | 0.55    | LHCB1 |
| <i>TraesCS7A02G238400</i> | 3.78    | 0.18  | 3.29    | 17.58   | LHCB1 |
| <i>TraesCS7A02G276400</i> | 905.93  | 3.87  | 1012.44 | 790.79  | LHCB1 |
| <i>TraesCS7B02G103300</i> | 0.13    | 0.00  | 0.21    | 0.65    | LHCB1 |
| <i>TraesCS7B02G103400</i> | 5.23    | 0.26  | 6.83    | 29.12   | LHCB1 |
| <i>TraesCS7D02G276300</i> | 482.41  | 3.67  | 603.91  | 707.16  | LHCB1 |
| <i>TraesCSU02G086800</i>  | 5.79    | 0.00  | 11.94   | 10.92   | LHCB1 |
| <i>TraesCSU02G167700</i>  | 45.66   | 0.53  | 60.24   | 194.25  | LHCB1 |
| <i>TraesCSU02G250000</i>  | 1.88    | 0.02  | 2.79    | 8.32    | LHCB1 |
| <i>TraesCS5A02G322500</i> | 711.02  | 10.33 | 752.13  | 750.21  | LHCB2 |
| <i>TraesCS5B02G322900</i> | 154.15  | 2.44  | 175.63  | 184.05  | LHCB2 |
| <i>TraesCS5D02G329200</i> | 1049.96 | 9.03  | 1278.11 | 993.71  | LHCB2 |
| <i>TraesCS1B02G451100</i> | 317.21  | 14.17 | 347.86  | 713.50  | LHCB3 |
| <i>TraesCS1B02G451200</i> | 102.70  | 3.30  | 54.90   | 99.91   | LHCB3 |
| <i>TraesCS1D02G428200</i> | 396.37  | 21.62 | 396.68  | 907.13  | LHCB3 |
| <i>TraesCS2A02G204800</i> | 198.63  | 8.15  | 220.35  | 258.71  | LHCB3 |
| <i>TraesCS2A02G206200</i> | 1133.81 | 60.96 | 1465.33 | 1769.44 | LHCB4 |
| <i>TraesCS2B02G233400</i> | 762.90  | 38.13 | 977.92  | 1101.55 | LHCB4 |
| <i>TraesCS2D02G209900</i> | 956.51  | 51.31 | 1228.85 | 1678.34 | LHCB4 |
| <i>TraesCS4A02G226900</i> | 1238.10 | 48.27 | 1463.41 | 1463.39 | LHCB5 |
| <i>TraesCS4B02G089500</i> | 1216.75 | 45.08 | 1501.33 | 1572.97 | LHCB5 |
| <i>TraesCS4D02G086400</i> | 1066.18 | 57.81 | 1355.81 | 1500.13 | LHCB5 |
| <i>TraesCS2A02G342600</i> | 478.70  | 21.38 | 571.60  | 570.64  | LHCB6 |
| <i>TraesCS2B02G340300</i> | 535.07  | 32.77 | 624.41  | 718.55  | LHCB6 |
| <i>TraesCS2D02G320900</i> | 450.35  | 27.11 | 497.71  | 604.52  | LHCB6 |
| <i>TraesCS5B02G175000</i> | 16.88   | 15.66 | 22.87   | 17.72   | LHCB7 |

---



**Table S5** List of enzyme activity-related DEGs identified in WT and *GSm*

| Group                   | Gene_id                   | TPM    |        |        |        | KO_name               |
|-------------------------|---------------------------|--------|--------|--------|--------|-----------------------|
|                         |                           | MS1    | MS2    | WS1    | WS2    |                       |
| Superoxide<br>dismutase | <i>TraesCS2A02G121200</i> | 173.59 | 364.35 | 94.25  | 111.28 | SOD1                  |
|                         | <i>TraesCS2D02G123300</i> | 153.27 | 251.15 | 105.86 | 102.15 | SOD1                  |
|                         | <i>TraesCS4A02G065800</i> | 48.08  | 32.84  | 52.79  | 64.51  | SOD1                  |
|                         | <i>TraesCS4B02G243200</i> | 71.01  | 76.14  | 93.24  | 118.59 | SOD1                  |
|                         | <i>TraesCS4D02G242800</i> | 31.74  | 21.51  | 30.23  | 41.25  | SOD1                  |
|                         | <i>TraesCS7A02G292100</i> | 48.82  | 34.37  | 58.62  | 83.73  | SOD1                  |
|                         | <i>TraesCS7B02G197300</i> | 44.26  | 55.62  | 52.10  | 84.77  | SOD1                  |
|                         | <i>TraesCS7D02G290700</i> | 61.30  | 54.88  | 67.05  | 94.29  | SOD1                  |
|                         | <i>TraesCS2A02G537100</i> | 46.14  | 38.93  | 43.25  | 24.10  | SOD2                  |
|                         | <i>TraesCS2B02G567600</i> | 9.00   | 13.25  | 5.47   | 9.10   | SOD2                  |
|                         | <i>TraesCS2D02G538300</i> | 60.43  | 73.14  | 62.83  | 39.19  | SOD2                  |
|                         | <i>TraesCS4A02G390300</i> | 3.97   | 14.72  | 6.86   | 11.01  | SOD2                  |
|                         | <i>TraesCS4A02G434000</i> | 4.50   | 7.76   | 5.56   | 9.10   | SOD2                  |
|                         | <i>TraesCS7A02G048600</i> | 4.21   | 6.43   | 4.95   | 6.78   | SOD2                  |
|                         | <i>TraesCS7A02G090400</i> | 9.92   | 18.11  | 19.92  | 24.73  | SOD2                  |
|                         | <i>TraesCS7D02G043000</i> | 10.96  | 31.84  | 13.93  | 26.17  | SOD2                  |
|                         | <i>TraesCS7D02G086400</i> | 12.22  | 28.12  | 21.59  | 31.61  | SOD2                  |
| Catalase                | <i>TraesCS4B02G325800</i> | 491.64 | 359.75 | 527.76 | 396.66 | katE, CAT, catB, srpA |
|                         | <i>TraesCS4D02G322700</i> | 348.77 | 260.92 | 381.72 | 283.34 | katE, CAT, catB, srpA |
|                         | <i>TraesCS5A02G498000</i> | 272.65 | 232.45 | 344.57 | 244.90 | katE, CAT, catB, srpA |
|                         | <i>TraesCS6A02G041700</i> | 3.56   | 234.12 | 3.87   | 6.69   | katE, CAT, catB, srpA |
|                         | <i>TraesCS6B02G056800</i> | 0.11   | 14.20  | 0.28   | 0.59   | katE, CAT, catB, srpA |
|                         | <i>TraesCS6B02G330700</i> | 14.36  | 25.85  | 9.64   | 12.60  | -----                 |
|                         | <i>TraesCS6D02G048300</i> | 4.68   | 115.62 | 4.92   | 13.00  | katE, CAT, catB, srpA |
|                         | <i>TraesCS7A02G549800</i> | 11.58  | 116.59 | 10.23  | 46.10  | katE, CAT, catB, srpA |
|                         | <i>TraesCS7A02G549900</i> | 0.74   | 6.55   | 0.38   | 3.76   | katE, CAT, catB, srpA |
|                         | <i>TraesCS7B02G473400</i> | 3.58   | 16.07  | 2.69   | 5.95   | katE, CAT, catB, srpA |
|                         | <i>TraesCSU02G105300</i>  | 16.78  | 98.39  | 13.81  | 36.82  | katE, CAT, catB, srpA |

|                            |                           |        |        |        |        |                 |
|----------------------------|---------------------------|--------|--------|--------|--------|-----------------|
|                            | <i>TraesCS2A02G582000</i> | 7.05   | 1.32   | 0.26   | 0.88   | -----           |
|                            | <i>TraesCS2A02G582100</i> | 12.46  | 3.73   | 15.89  | 14.03  | gpx, btuE, bsaA |
|                            | <i>TraesCS2A02G582200</i> | 12.58  | 2.55   | 12.11  | 7.07   | gpx, btuE, bsaA |
|                            | <i>TraesCS2B02G429100</i> | 19.81  | 46.42  | 12.52  | 16.89  | gpx, btuE, bsaA |
|                            | <i>TraesCS2B02G604800</i> | 31.97  | 9.73   | 37.87  | 13.61  | gpx, btuE, bsaA |
|                            | <i>TraesCS2B02G604900</i> | 26.81  | 7.21   | 29.72  | 8.53   | gpx, btuE, bsaA |
|                            | <i>TraesCS2B02G605000</i> | 5.73   | 2.06   | 0.29   | 1.27   | -----           |
|                            | <i>TraesCS2D02G407700</i> | 21.38  | 51.72  | 18.38  | 15.81  | gpx, btuE, bsaA |
|                            | <i>TraesCS2D02G598000</i> | 7.81   | 5.05   | 10.44  | 6.59   | gpx, btuE, bsaA |
|                            | <i>TraesCS2D02G598100</i> | 3.38   | 3.70   | 5.04   | 0.31   | gpx, btuE, bsaA |
|                            | <i>TraesCS2D02G598200</i> | 3.74   | 1.66   | 0.10   | 0.68   | -----           |
|                            | <i>TraesCS4A02G142000</i> | 40.08  | 90.41  | 31.78  | 58.33  | gpx, btuE, bsaA |
|                            | <i>TraesCS4A02G269600</i> | 24.23  | 51.41  | 10.10  | 20.96  | GST, gst        |
|                            | <i>TraesCS4A02G269800</i> | 45.71  | 34.08  | 20.61  | 18.93  | GST, gst        |
|                            | <i>TraesCS4B02G044300</i> | 48.70  | 85.29  | 18.17  | 36.03  | GST, gst        |
|                            | <i>TraesCS4B02G044500</i> | 22.02  | 12.53  | 2.20   | 6.02   | GST, gst        |
| Glutathione S-transferases | <i>TraesCS4B02G152800</i> | 35.98  | 93.22  | 31.91  | 49.00  | gpx, btuE, bsaA |
|                            | <i>TraesCS4D02G042000</i> | 41.43  | 49.48  | 7.92   | 21.93  | GST, gst        |
|                            | <i>TraesCS4D02G162000</i> | 42.14  | 92.35  | 37.40  | 60.35  | gpx, btuE, bsaA |
|                            | <i>TraesCS6A02G246400</i> | 59.66  | 68.55  | 76.67  | 52.41  | gpx, btuE, bsaA |
|                            | <i>TraesCS6B02G278100</i> | 16.91  | 21.83  | 17.03  | 8.35   | gpx, btuE, bsaA |
|                            | <i>TraesCS6D02G228800</i> | 29.52  | 34.02  | 38.95  | 19.15  | gpx, btuE, bsaA |
|                            | <i>TraesCS7A02G150500</i> | 141.08 | 100.64 | 307.06 | 381.00 | gpx, btuE, bsaA |
|                            | <i>TraesCS7B02G054400</i> | 27.95  | 18.08  | 51.26  | 97.35  | gpx, btuE, bsaA |
|                            | <i>TraesCS7D02G152400</i> | 113.24 | 61.33  | 245.38 | 262.12 | gpx, btuE, bsaA |
|                            | <i>TraesCS1A02G077700</i> | 1.92   | 10.01  | 1.69   | 1.31   | E1.11.1.7       |
|                            | <i>TraesCS1A02G108400</i> | 0.65   | 4.21   | 0.23   | 1.38   | E1.11.1.7       |
|                            | <i>TraesCS1B02G095800</i> | 1.40   | 8.39   | 0.85   | 2.50   | E1.11.1.7       |
|                            | <i>TraesCS1D02G096400</i> | 0.98   | 6.11   | 0.12   | 1.01   | E1.11.1.7       |
|                            | <i>TraesCS1D02G174200</i> | 5.53   | 14.31  | 7.33   | 9.83   | E1.11.1.7       |
|                            | <i>TraesCS2A02G263500</i> | 53.48  | 83.64  | 71.36  | 55.28  | E1.11.1.7       |
|                            | <i>TraesCS2A02G333500</i> | 2.01   | 17.69  | 2.35   | 0.69   | E1.11.1.7       |

|            |                           |       |        |       |       |           |
|------------|---------------------------|-------|--------|-------|-------|-----------|
| Peroxidase | <i>TraesCS2A02G571300</i> | 2.37  | 12.73  | 1.68  | 7.06  | E1.11.1.7 |
|            | <i>TraesCS2B02G278500</i> | 21.85 | 19.37  | 27.87 | 23.79 | E1.11.1.7 |
|            | <i>TraesCS2B02G346800</i> | 1.74  | 10.90  | 1.45  | 0.43  | E1.11.1.7 |
|            | <i>TraesCS2B02G613400</i> | 5.65  | 9.28   | 5.78  | 6.98  | E1.11.1.7 |
|            | <i>TraesCS2B02G614100</i> | 0.10  | 18.47  | 0.00  | 0.00  | E1.11.1.7 |
|            | <i>TraesCS2D02G260300</i> | 31.65 | 12.33  | 43.01 | 12.83 | E1.11.1.7 |
|            | <i>TraesCS2D02G327700</i> | 1.59  | 5.17   | 2.09  | 0.95  | E1.11.1.7 |
|            | <i>TraesCS2D02G583000</i> | 4.25  | 25.55  | 2.41  | 13.40 | E1.11.1.7 |
|            | <i>TraesCS2D02G583200</i> | 0.50  | 1.75   | 0.01  | 0.60  | E1.11.1.7 |
|            | <i>TraesCS3A02G183500</i> | 25.23 | 26.10  | 35.76 | 29.28 | -----     |
|            | <i>TraesCS3A02G185900</i> | 6.04  | 110.10 | 4.84  | 0.86  | E1.11.1.7 |
|            | <i>TraesCS3A02G297100</i> | 0.11  | 0.96   | 0.00  | 0.03  | E1.11.1.7 |
|            | <i>TraesCS3A02G297200</i> | 0.22  | 18.85  | 0.19  | 0.29  | E1.11.1.7 |
|            | <i>TraesCS3A02G325100</i> | 1.72  | 13.47  | 1.99  | 0.55  | E1.11.1.7 |
|            | <i>TraesCS3B02G213200</i> | 1.03  | 5.60   | 1.69  | 2.66  | -----     |
|            | <i>TraesCS3B02G215500</i> | 4.59  | 50.73  | 8.12  | 0.85  | E1.11.1.7 |
|            | <i>TraesCS3B02G354000</i> | 0.63  | 6.13   | 0.50  | 0.18  | E1.11.1.7 |
|            | <i>TraesCS3B02G578600</i> | 0.03  | 5.08   | 0.00  | 0.01  | E1.11.1.7 |
|            | <i>TraesCS3D02G187600</i> | 13.97 | 12.72  | 16.18 | 15.23 | -----     |
|            | <i>TraesCS3D02G189900</i> | 2.31  | 86.67  | 1.35  | 0.16  | E1.11.1.7 |
|            | <i>TraesCS3D02G305300</i> | 0.06  | 2.23   | 0.11  | 0.11  | E1.11.1.7 |
|            | <i>TraesCS3D02G318500</i> | 1.59  | 12.68  | 0.89  | 0.44  | E1.11.1.7 |
|            | <i>TraesCS3D02G518200</i> | 0.23  | 5.43   | 0.00  | 0.13  | E1.11.1.7 |
|            | <i>TraesCS4A02G196300</i> | 0.00  | 6.59   | 0.00  | 0.01  | E1.11.1.7 |
|            | <i>TraesCS4A02G196400</i> | 0.03  | 6.63   | 0.00  | 0.00  | E1.11.1.7 |
|            | <i>TraesCS4D02G342600</i> | 0.57  | 5.34   | 1.45  | 0.08  | E1.11.1.7 |
|            | <i>TraesCS5A02G249200</i> | 5.26  | 6.07   | 6.32  | 4.63  | E1.11.1.7 |
|            | <i>TraesCS5A02G288200</i> | 0.57  | 14.80  | 0.73  | 0.55  | E1.11.1.7 |
|            | <i>TraesCS5A02G400500</i> | 0.75  | 15.09  | 0.03  | 0.04  | E1.11.1.7 |
|            | <i>TraesCS5B02G246900</i> | 8.54  | 10.67  | 4.57  | 3.76  | E1.11.1.7 |
|            | <i>TraesCS5B02G405300</i> | 0.13  | 17.63  | 0.00  | 0.10  | E1.11.1.7 |

---

|                           |       |       |       |       |            |
|---------------------------|-------|-------|-------|-------|------------|
| <i>TraesCS5D02G256400</i> | 5.95  | 5.49  | 6.12  | 4.33  | E1.11.1.7  |
| <i>TraesCS5D02G410500</i> | 0.16  | 12.83 | 0.04  | 0.14  | E1.11.1.7  |
| <i>TraesCS6A02G118300</i> | 5.50  | 6.22  | 3.03  | 2.77  | E1.11.1.7  |
| <i>TraesCS6B02G146500</i> | 2.78  | 10.21 | 2.10  | 1.53  | E1.11.1.7  |
| <i>TraesCS6D02G108400</i> | 5.10  | 20.40 | 4.93  | 3.45  | E1.11.1.7  |
| <i>TraesCS7A02G250500</i> | 14.72 | 14.48 | 25.03 | 38.57 | E1.11.1.11 |
| <i>TraesCS7A02G319100</i> | 0.21  | 8.52  | 0.07  | 0.03  | E1.11.1.7  |
| <i>TraesCS7A02G339600</i> | 1.45  | 16.43 | 0.26  | 0.64  | E1.11.1.7  |
| <i>TraesCS7A02G428200</i> | 4.46  | 9.82  | 6.10  | 1.76  | E1.11.1.7  |
| <i>TraesCS7B02G099800</i> | 2.38  | 10.57 | 1.40  | 1.91  | -----      |
| <i>TraesCS7B02G140600</i> | 15.08 | 20.70 | 30.30 | 23.55 | E1.11.1.11 |
| <i>TraesCS7B02G328400</i> | 2.05  | 20.18 | 2.28  | 1.43  | E1.11.1.7  |
| <i>TraesCS7D02G212900</i> | 2.65  | 13.07 | 1.87  | 2.38  | E1.11.1.7  |
| <i>TraesCS7D02G249200</i> | 17.94 | 18.19 | 32.03 | 40.81 | E1.11.1.11 |
| <i>TraesCS7D02G347300</i> | 0.69  | 3.80  | 0.13  | 0.58  | E1.11.1.7  |
| <i>TraesCS7D02G420500</i> | 2.79  | 75.08 | 4.11  | 2.20  | E1.11.1.7  |

**Table S6** List of cytokinin and gibberellin-related DEGs identified in WT and *GSm*

| Group | Gene_id                   | TPM  |      |      |      |
|-------|---------------------------|------|------|------|------|
|       |                           | MS1  | MS2  | WS1  | WS2  |
|       | <i>TraesCS1B02G137600</i> | 1.40 | 0.12 | 2.07 | 0.31 |
|       | <i>TraesCS1B02G176000</i> | 0.29 | 0.95 | 0.14 | 0.58 |
|       | <i>TraesCS1B02G323900</i> | 0.00 | 0.06 | 0.00 | 0.00 |
|       | <i>TraesCS2A02G265700</i> | 2.72 | 5.16 | 3.49 | 2.61 |
|       | <i>TraesCS2B02G150300</i> | 0.52 | 1.25 | 0.15 | 0.39 |
| CK    | <i>TraesCS2D02G407200</i> | 0.15 | 2.08 | 0.64 | 0.79 |
|       | <i>TraesCS2D02G407300</i> | 4.73 | 9.19 | 6.52 | 8.99 |
|       | <i>TraesCS3A02G109500</i> | 0.00 | 0.04 | 0.00 | 0.00 |
|       | <i>TraesCS3A02G311100</i> | 0.30 | 0.08 | 0.00 | 0.05 |
|       | <i>TraesCS3B02G128700</i> | 0.00 | 0.02 | 0.00 | 0.02 |
|       | <i>TraesCS3B02G344600</i> | 1.29 | 1.79 | 0.99 | 0.63 |

|    |                           |       |       |        |       |
|----|---------------------------|-------|-------|--------|-------|
| GA | <i>TraesCS3D02G127100</i> | 1.41  | 4.64  | 0.38   | 1.09  |
|    | <i>TraesCS3D02G263000</i> | 0.71  | 0.73  | 0.44   | 0.08  |
|    | <i>TraesCS3D02G310200</i> | 1.50  | 0.42  | 0.25   | 0.25  |
|    | <i>TraesCS4A02G345200</i> | 0.87  | 1.25  | 1.29   | 1.59  |
|    | <i>TraesCS5A02G444500</i> | 1.46  | 0.47  | 2.20   | 0.14  |
|    | <i>TraesCS5B02G528800</i> | 1.26  | 0.74  | 1.01   | 0.79  |
|    | <i>TraesCS7A02G536900</i> | 3.34  | 2.00  | 7.04   | 17.86 |
|    | <i>TraesCS7A02G560300</i> | 0.53  | 0.74  | 0.54   | 0.96  |
|    | <i>TraesCS7B02G075300</i> | 0.17  | 0.01  | 0.16   | 0.02  |
|    | <i>TraesCS7B02G455000</i> | 2.93  | 2.99  | 4.48   | 7.47  |
|    | <i>TraesCS7D02G171100</i> | 0.21  | 0.02  | 0.09   | 0.07  |
|    | <i>TraesCS7D02G171200</i> | 0.23  | 0.02  | 0.18   | 0.09  |
|    | <i>TraesCS7D02G190600</i> | 2.07  | 23.94 | 6.94   | 0.57  |
|    | <i>TraesCS2A02G027800</i> | 0.02  | 0.00  | 0.02   | 0.19  |
|    | <i>TraesCS2A02G425500</i> | 2.28  | 13.74 | 4.03   | 11.05 |
|    | <i>TraesCS2B02G396000</i> | 0.04  | 0.15  | 0.03   | 0.00  |
|    | <i>TraesCS2B02G445300</i> | 15.62 | 6.11  | 29.58  | 19.02 |
|    | <i>TraesCS2B02G445500</i> | 0.01  | 0.01  | 0.01   | 0.20  |
|    | <i>TraesCS2B02G445600</i> | 0.01  | 0.09  | 0.02   | 0.31  |
|    | <i>TraesCS2B02G445900</i> | 1.33  | 0.01  | 2.31   | 0.39  |
|    | <i>TraesCS2D02G423500</i> | 72.63 | 0.93  | 113.47 | 56.12 |
|    | <i>TraesCS3A02G086100</i> | 0.10  | 0.00  | 0.04   | 0.00  |
|    | <i>TraesCS3A02G294000</i> | 0.17  | 2.69  | 0.11   | 0.01  |
|    | <i>TraesCS3B02G328700</i> | 0.07  | 2.64  | 0.04   | 0.00  |
|    | <i>TraesCS3D02G124500</i> | 0.01  | 0.17  | 0.03   | 0.00  |
|    | <i>TraesCS3D02G293800</i> | 0.02  | 1.04  | 0.02   | 0.00  |
|    | <i>TraesCS4A02G460100</i> | 4.13  | 0.11  | 6.09   | 3.84  |
|    | <i>TraesCS4B02G376200</i> | 1.30  | 6.22  | 0.65   | 0.87  |
|    | <i>TraesCS5A02G064200</i> | 1.12  | 0.30  | 1.98   | 1.99  |
|    | <i>TraesCS5B02G068500</i> | 0.46  | 0.19  | 0.36   | 1.13  |
|    | <i>TraesCS7A02G029600</i> | 0.74  | 0.22  | 1.01   | 0.16  |

|                           |      |      |      |       |
|---------------------------|------|------|------|-------|
| <i>TraesCS7A02G362300</i> | 0.78 | 1.12 | 2.35 | 12.60 |
| <i>TraesCS7A02G552700</i> | 0.19 | 0.08 | 0.17 | 0.03  |
| <i>TraesCS7B02G476400</i> | 0.15 | 0.05 | 0.11 | 0.04  |
| <i>TraesCS7D02G026000</i> | 4.70 | 0.20 | 7.71 | 4.72  |
| <i>TraesCS7D02G539200</i> | 0.60 | 0.70 | 1.07 | 0.91  |
| <i>TraesCSU02G008700</i>  | 0.03 | 0.01 | 0.06 | 0.48  |
| <i>TraesCSU02G008900</i>  | 0.01 | 0.02 | 0.04 | 0.30  |
| <i>TraesCSU02G009100</i>  | 0.71 | 0.99 | 0.14 | 0.61  |

**Table S7** Primers for quantitative real-time polymerase chain reaction

| Gene_id                   | Forward primer           | Reverse primer          |
|---------------------------|--------------------------|-------------------------|
| <i>TraesCS1D02G232700</i> | CCCAGGGTCGTGGATGACTT     | GCCTGGTACTTGTCCCGGTAGA  |
| <i>TraesCS2D02G163300</i> | CTTCTACCTTGTTTCAGCAATGGC | ACTTCTTCTTGCGCTTGGTCAC  |
| <i>TraesCS3D02G017700</i> | TCACCAAGATGGACAAGGCG     | ATGCGTGGCAGGAGAAGTGAC   |
| <i>TraesCS3D02G223300</i> | CGAAAAGGAGGCAGTGAACGT    | ACTGGAAAACAACGAGTACGCAC |
| <i>TraesCS5B02G115300</i> | AGGCCACGCTCAACCTCAATG    | GCCGTCGCTGGTGTACTTTCC   |
| <i>TraesCS7A02G319100</i> | CTGCTTCGTACAGGGATGCG     | CGGTCAGCGTGTCGGTGT      |
